# Supplementary material for: Compound Kushen injection reduces severity of radiation-induced gastrointestinal mucositis in rats
Source: Frontiers journal article supplement (doi:10.3389/fonc.2022.929735), 2022-08-11
Supplement: Image_1.PDF [file Image_1.PDF]

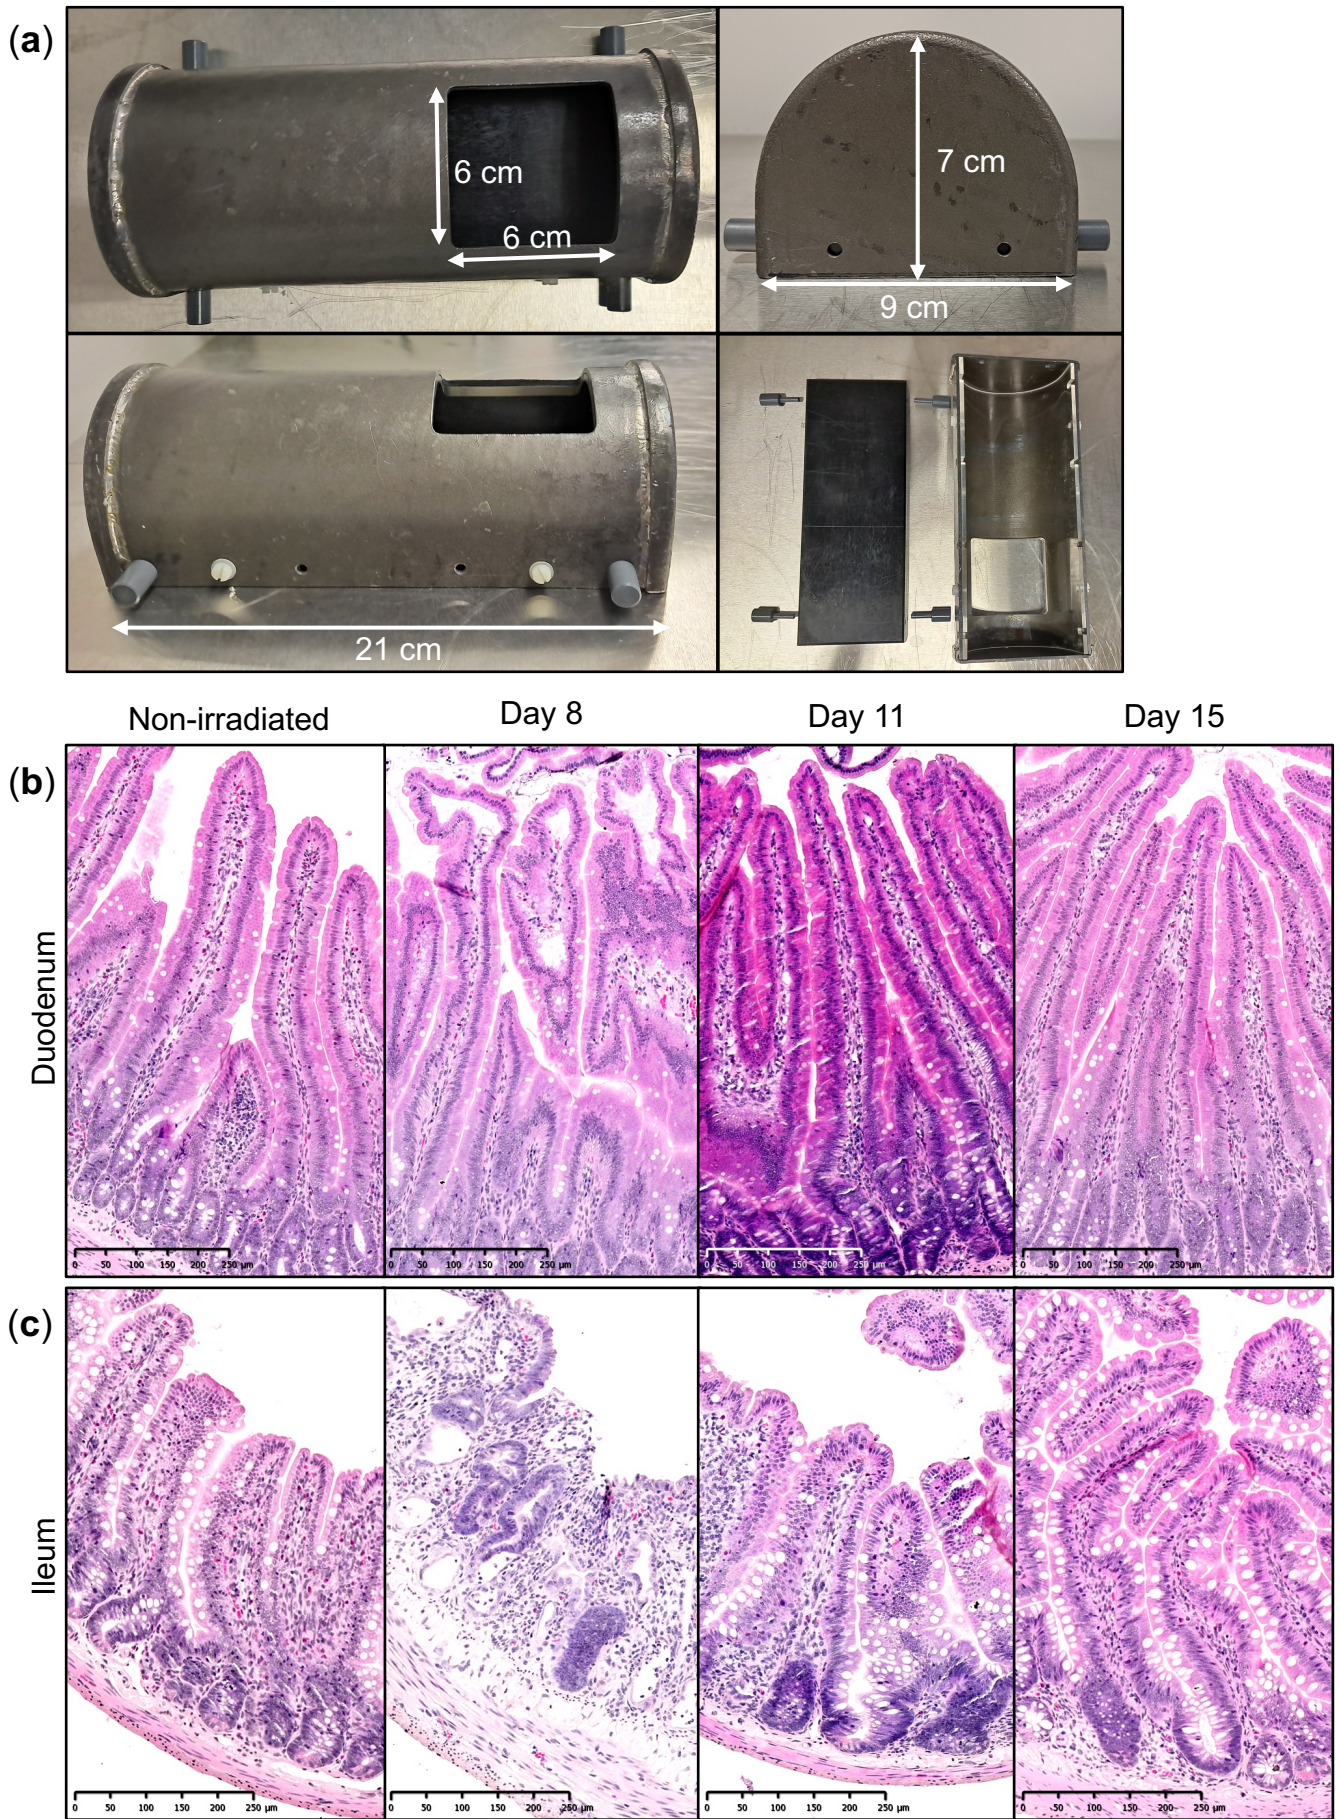

**Supplementary figure 1:** Establishment of fractionated radiation induced GIM model in SD rats. **(a)** Images of the lead capsule with dimensions. **(b and c)** Representative images of H and E stained duodenum **(b)** and ileum **(c)** sections during GIM. The intestines were collected from irradiated rats on days 8, 11 and 15 and embedded in paraffin for H and E staining.
