# Supplementary material for: Compound Kushen injection reduces severity of radiation-induced gastrointestinal mucositis in rats
Source: Frontiers journal article supplement (doi:10.3389/fonc.2022.929735), 2022-08-11
Supplement: Image_2.PDF [file Image_2.PDF]

(a) Day 7

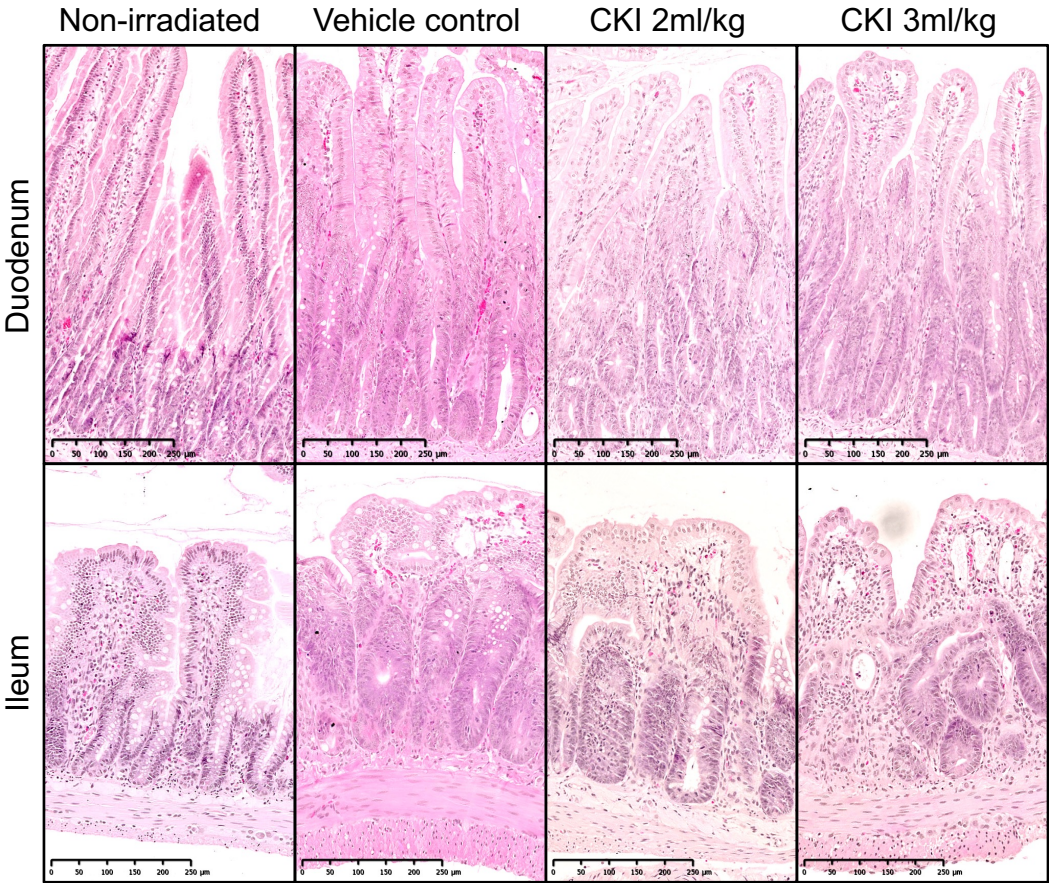



(b) Day 11

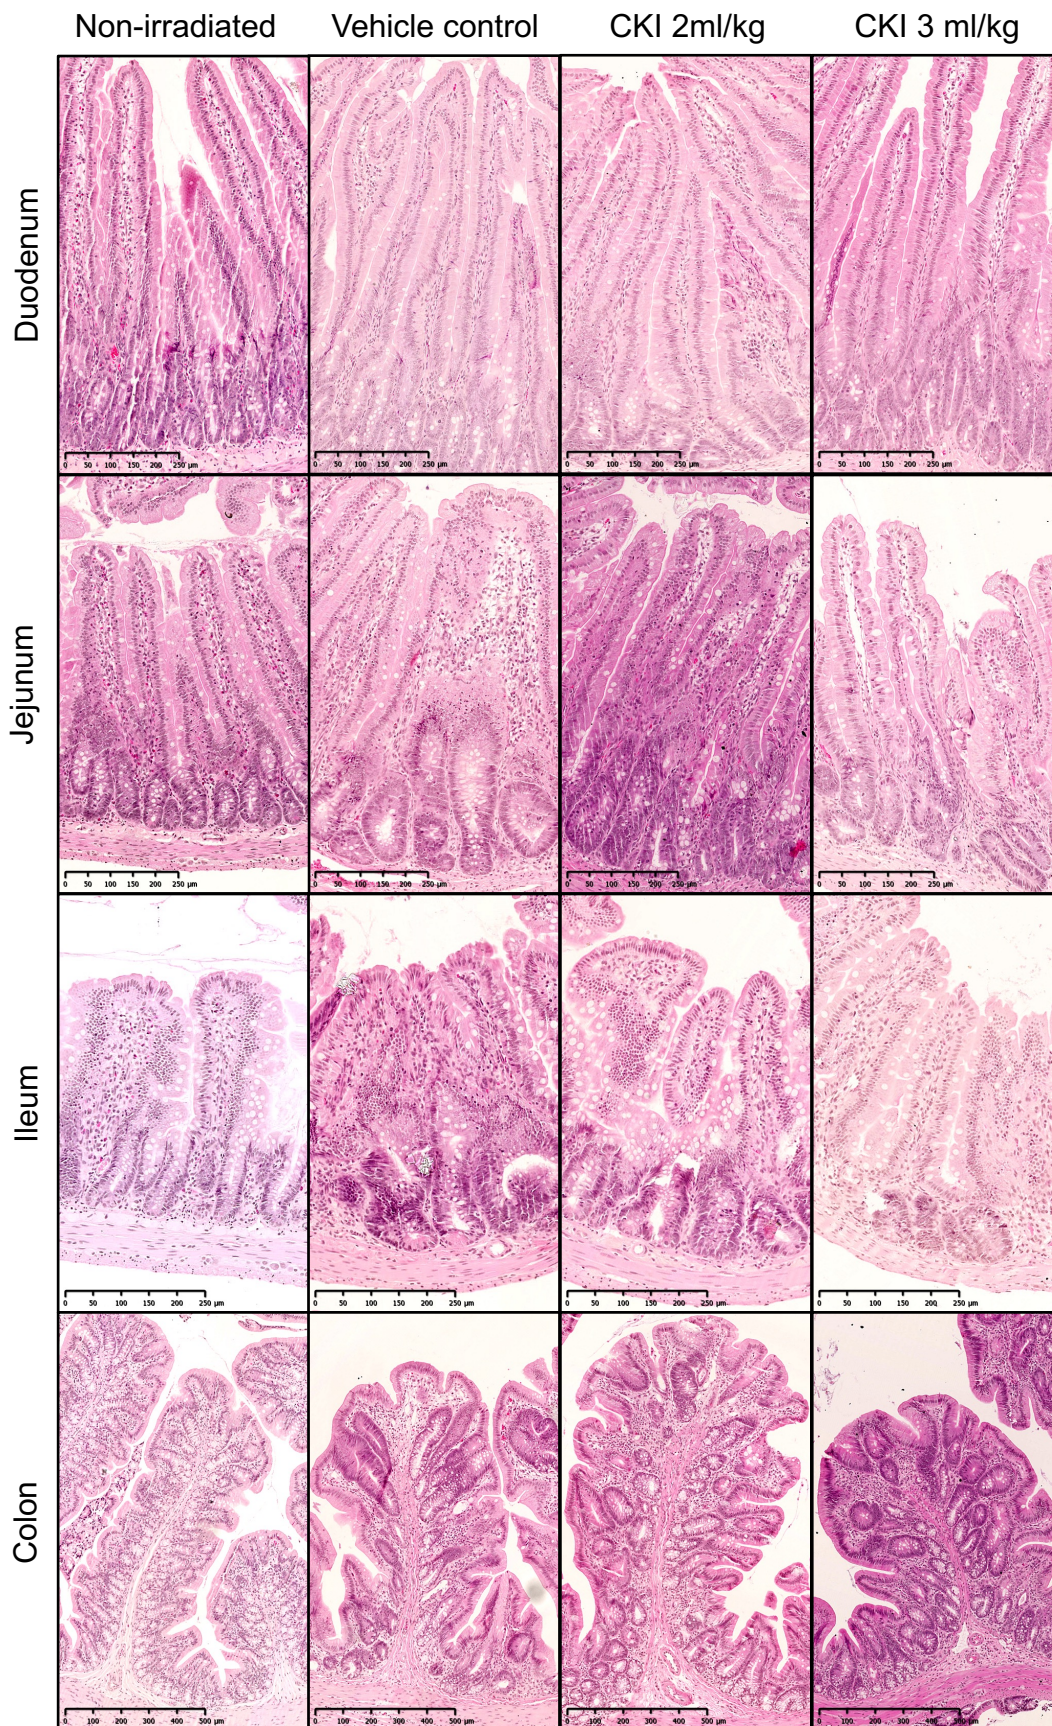

**Supplementary figure 2:** Administration of CKI reduces radiation induced mucosal damage. Representatives images of H and E stained duodenum and ileum sections from day 7 (a) and duodenum, jejunum, ileum and colon sections from day 11 (b). The intestines were collected from irradiated rats and paraffin-embedded tissues were sectioned for H & E staining.
