# Supplementary material for: Compound Kushen injection reduces severity of radiation-induced gastrointestinal mucositis in rats
Source: Frontiers journal article supplement (doi:10.3389/fonc.2022.929735), 2022-08-11
Supplement: Image_3.pdf [file Image_3.pdf]

(a) Duodenum

Non-irradiated

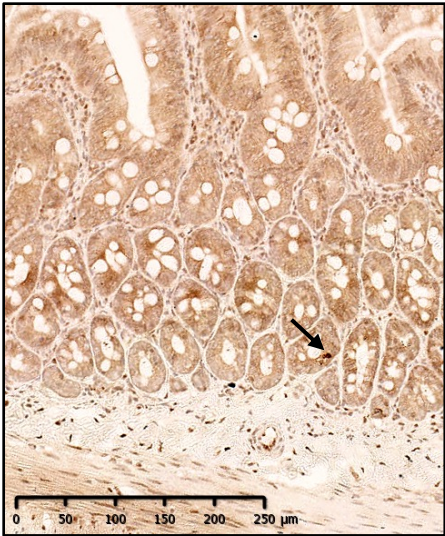

Vehicle control

CKI 2ml/kg

CKI 3 ml/kg

Day 7

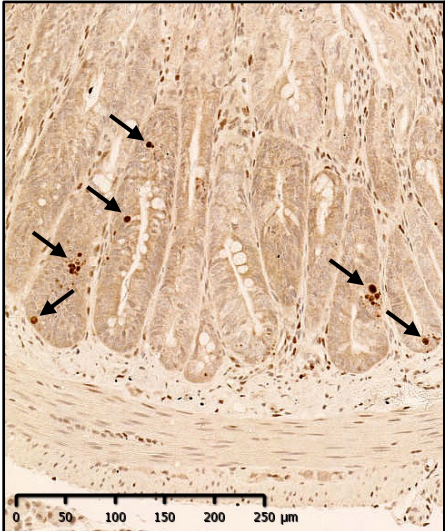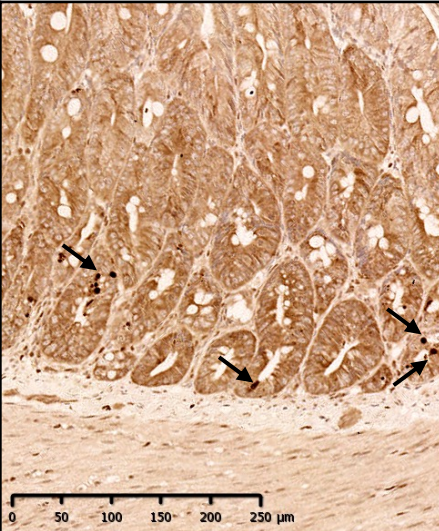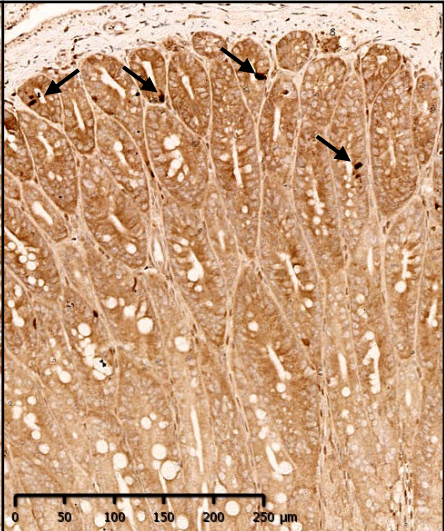

Day 11

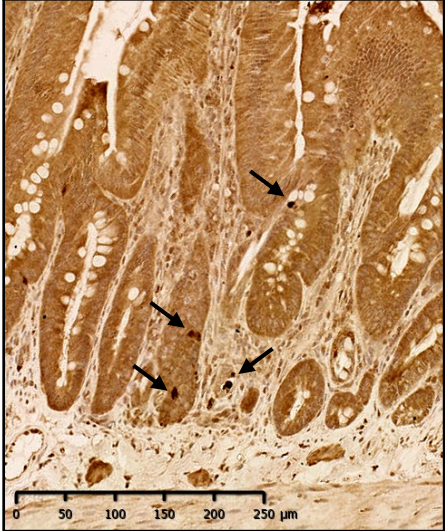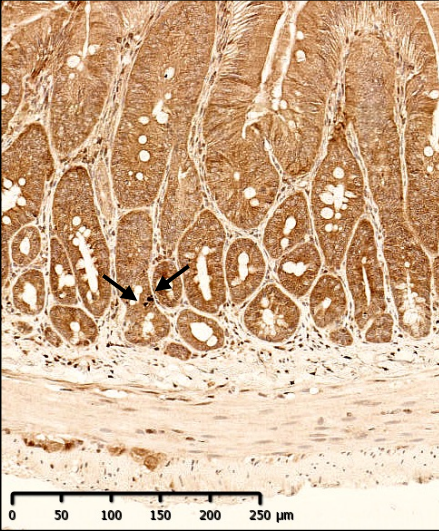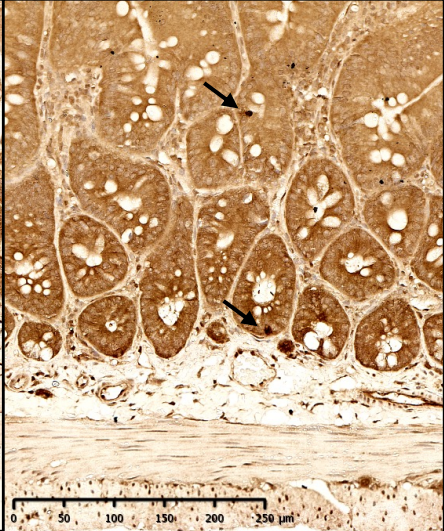



(b) Jejunum

Non-irradiated

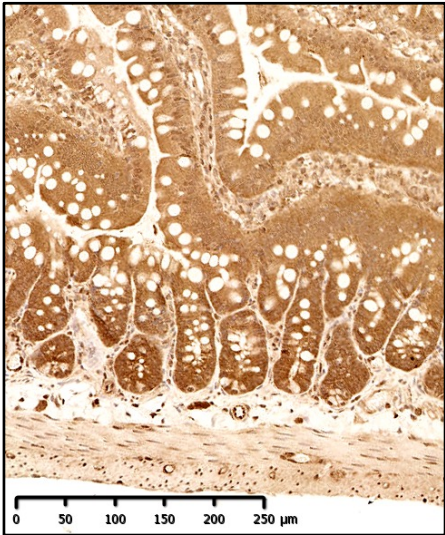

Vehicle control

CKI 2ml/kg

CKI 3 ml/kg

Day 7

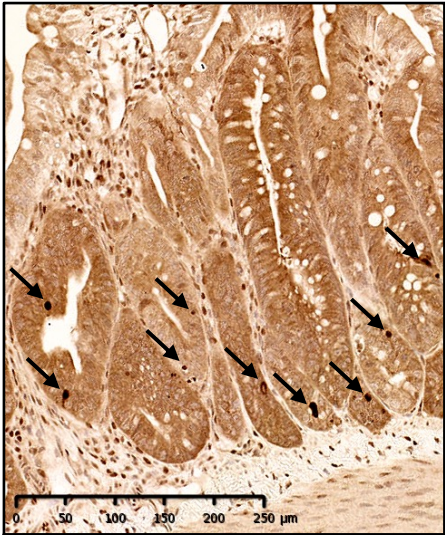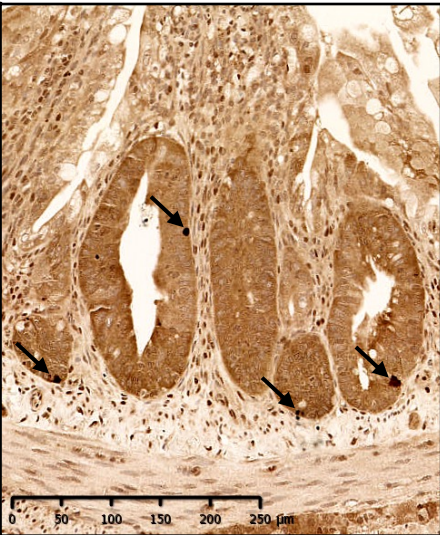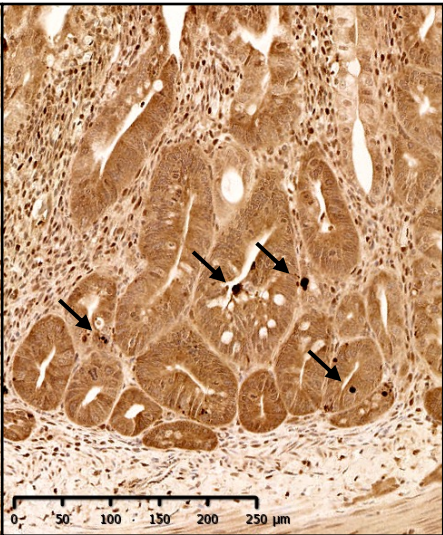

Day 11

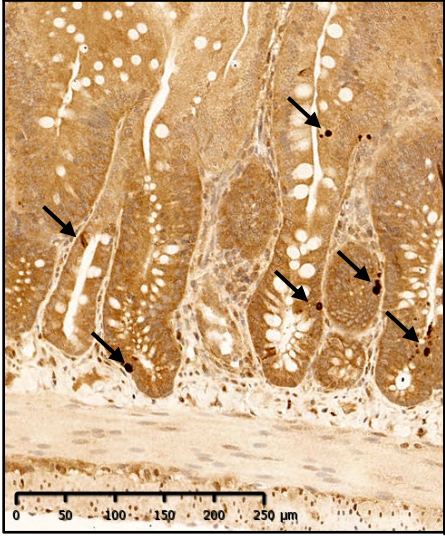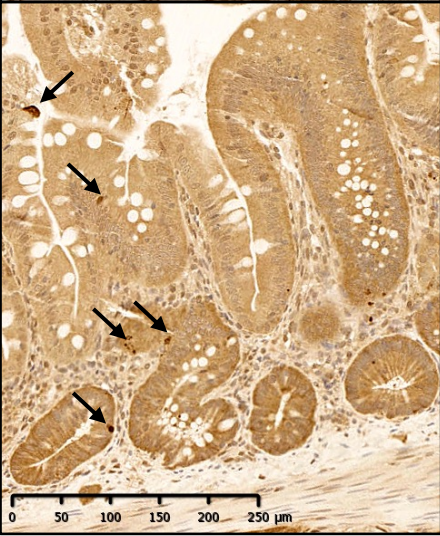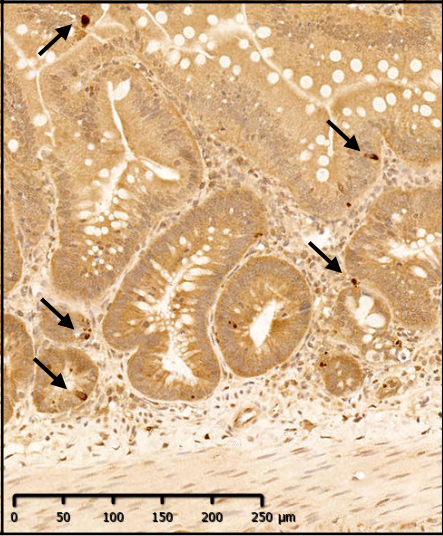



(c) Ileum

Non-irradiated

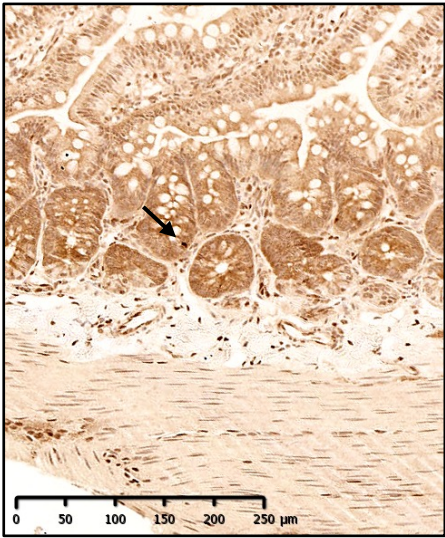

Vehicle control

CKI 2ml/kg

CKI 3 ml/kg

Day 7

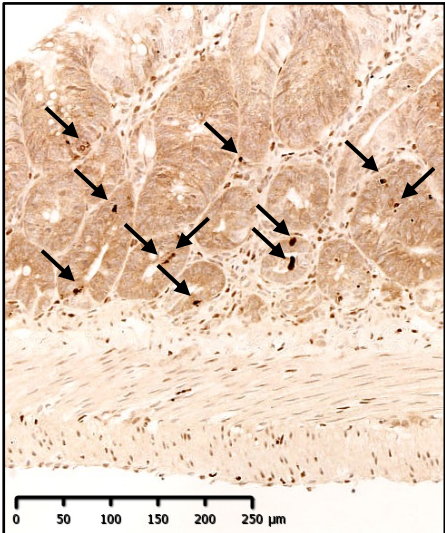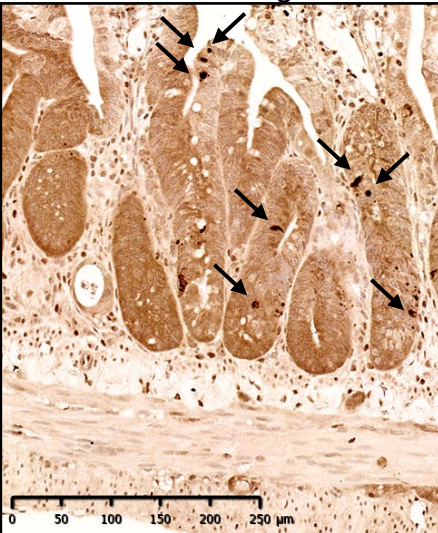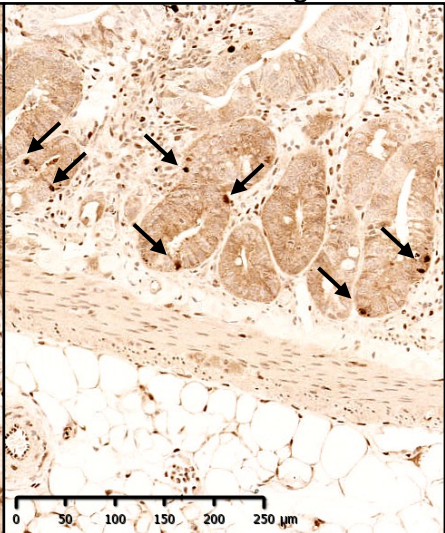

Day 11

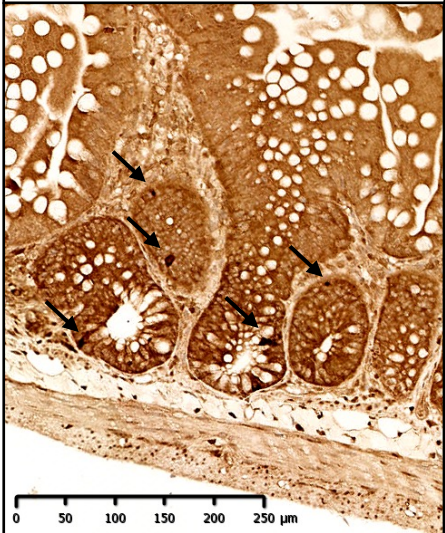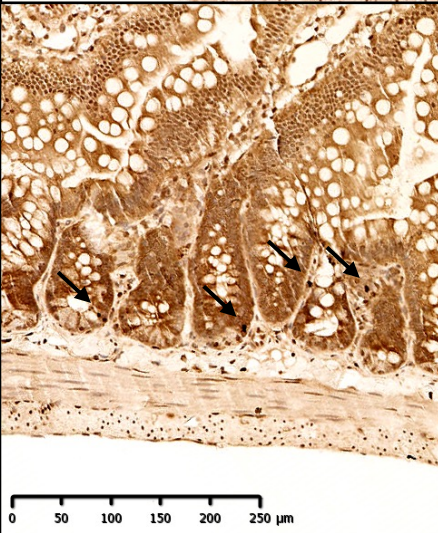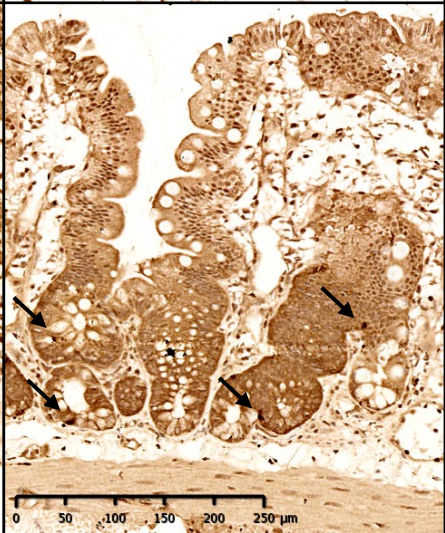



(d) Colon

Non-irradiated

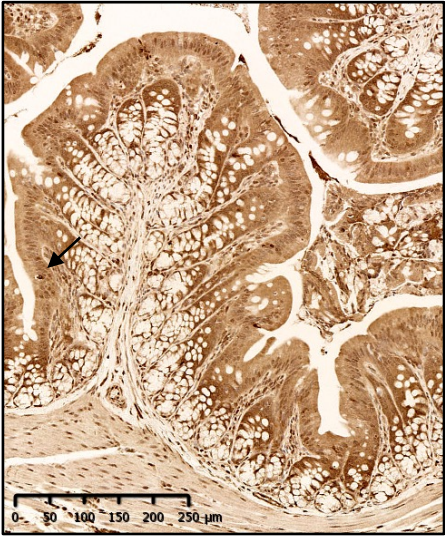

Vehicle control

CKI 2ml/kg

CKI 3 ml/kg

Day 7

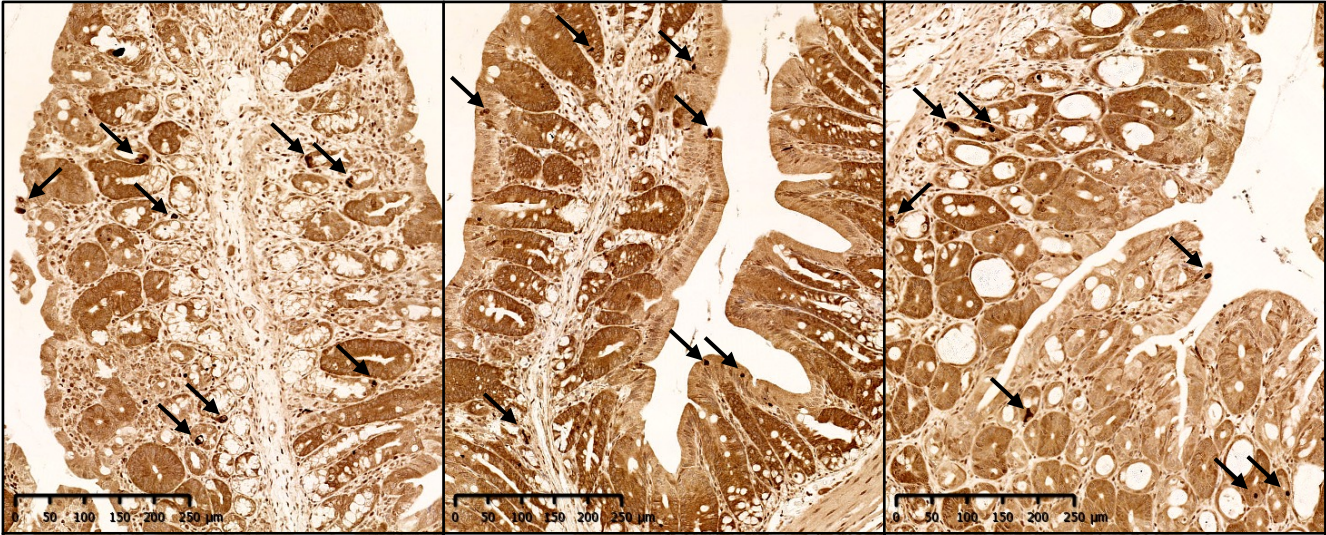

Day 11

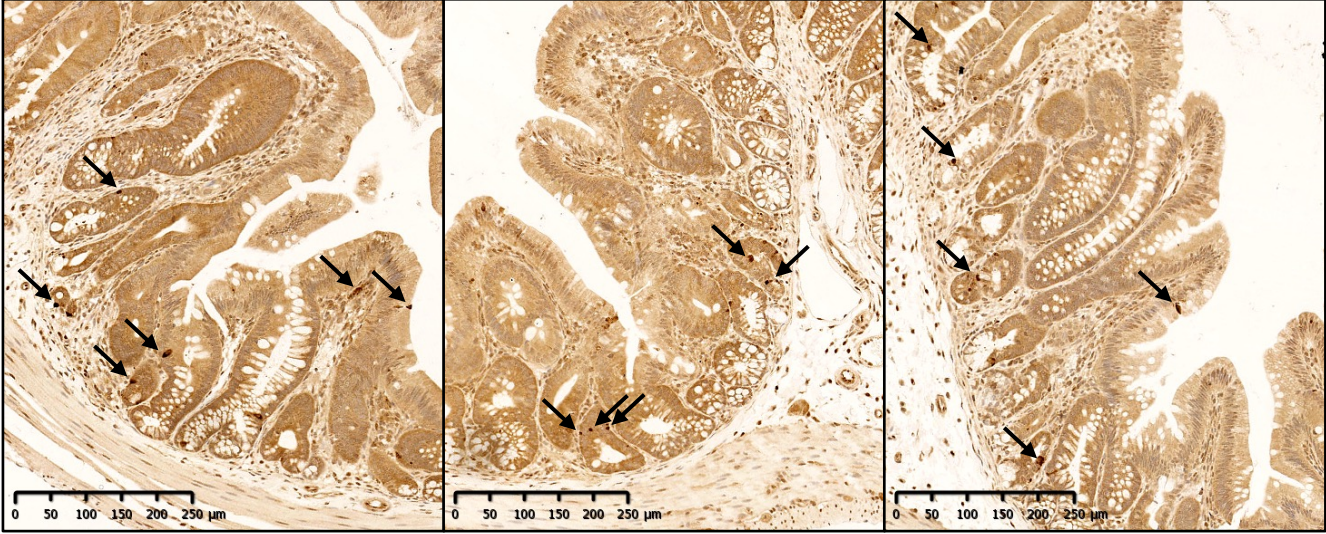



**Supplementary figure 3:** Administration of CKI prevents cell apoptosis of irradiated epithelia on day 7 post irradiation. Representative IHC images of duodenum (a), jejunum (b), ileum (c) and colon (d) sections stained for Caspase-3. The intestines were collected from irradiated rats on day 7 and 11 post initial irradiation and paraffin-embedded tissues were sectioned for IHC detecting Caspase-3. Note: The images of jejunum for “Non-irradiated” and “Day 7” are presented in the article.
