# Supplementary material for: Compound Kushen injection reduces severity of radiation-induced gastrointestinal mucositis in rats
Source: Frontiers journal article supplement (doi:10.3389/fonc.2022.929735), 2022-08-11
Supplement: Image_4.PDF [file Image_4.PDF]

(a) Duodenum

Non-irradiated

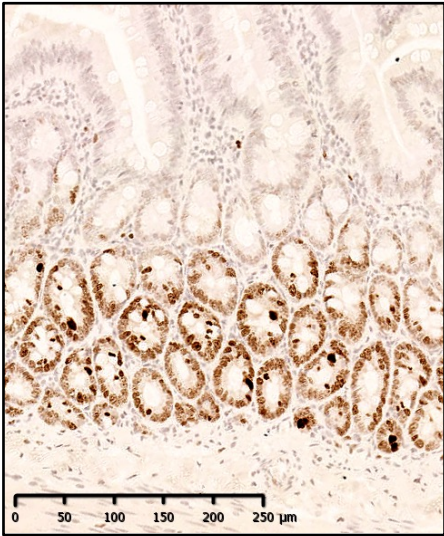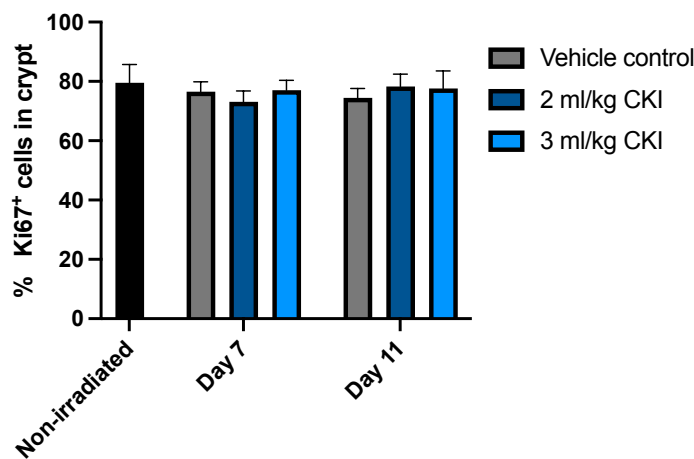

Vehicle control

CKI 2ml/kg

CKI 3 ml/kg

Day 7

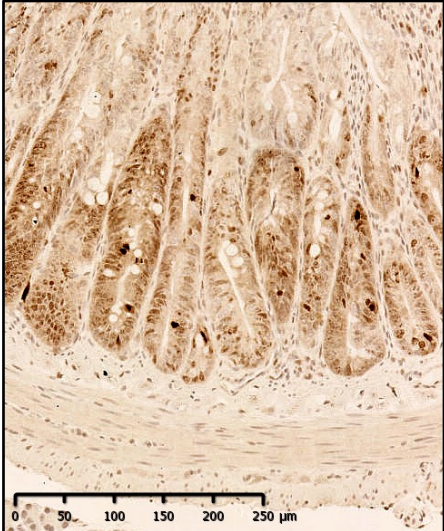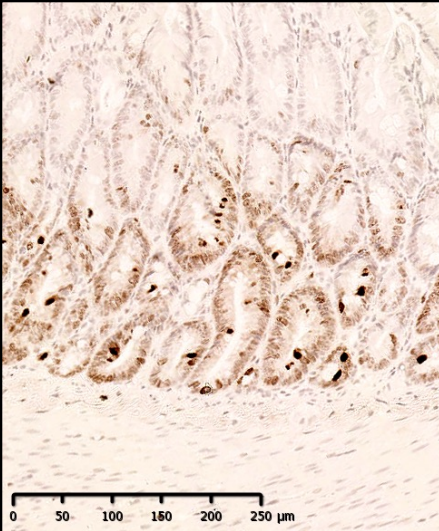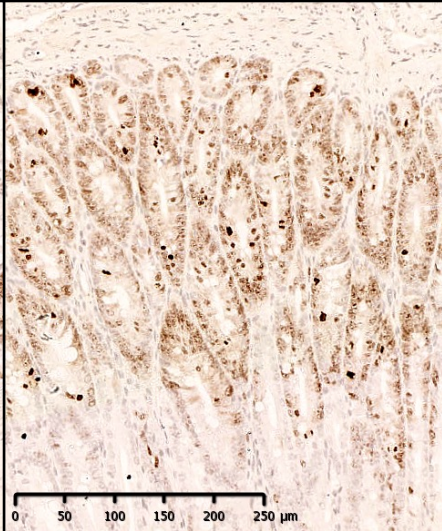

Day 11

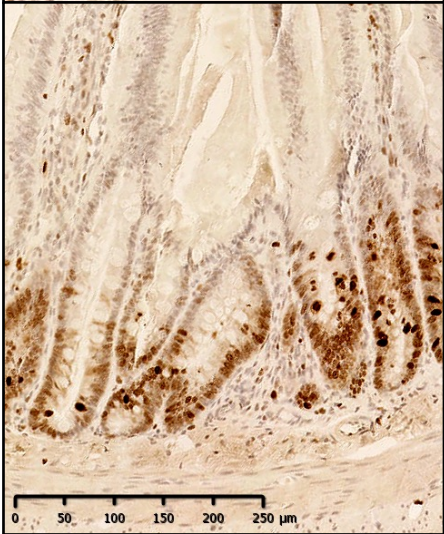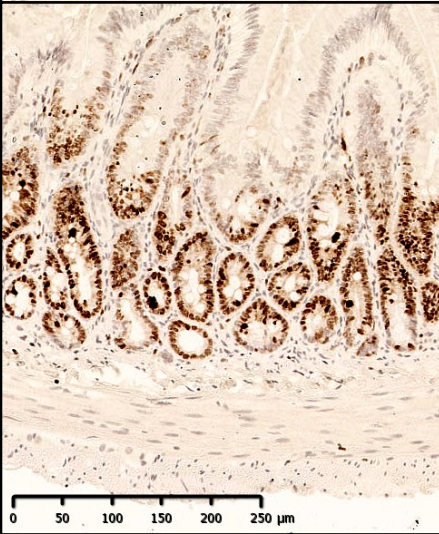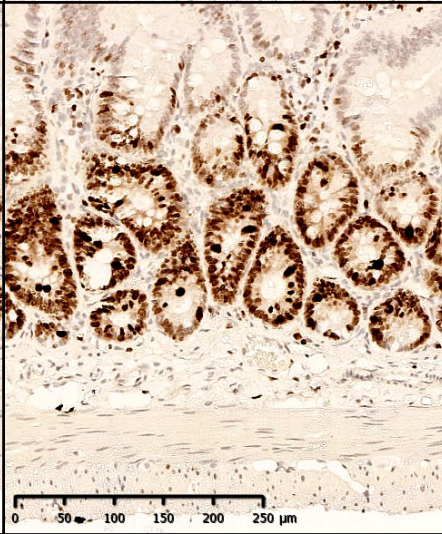



(b) Jejunum

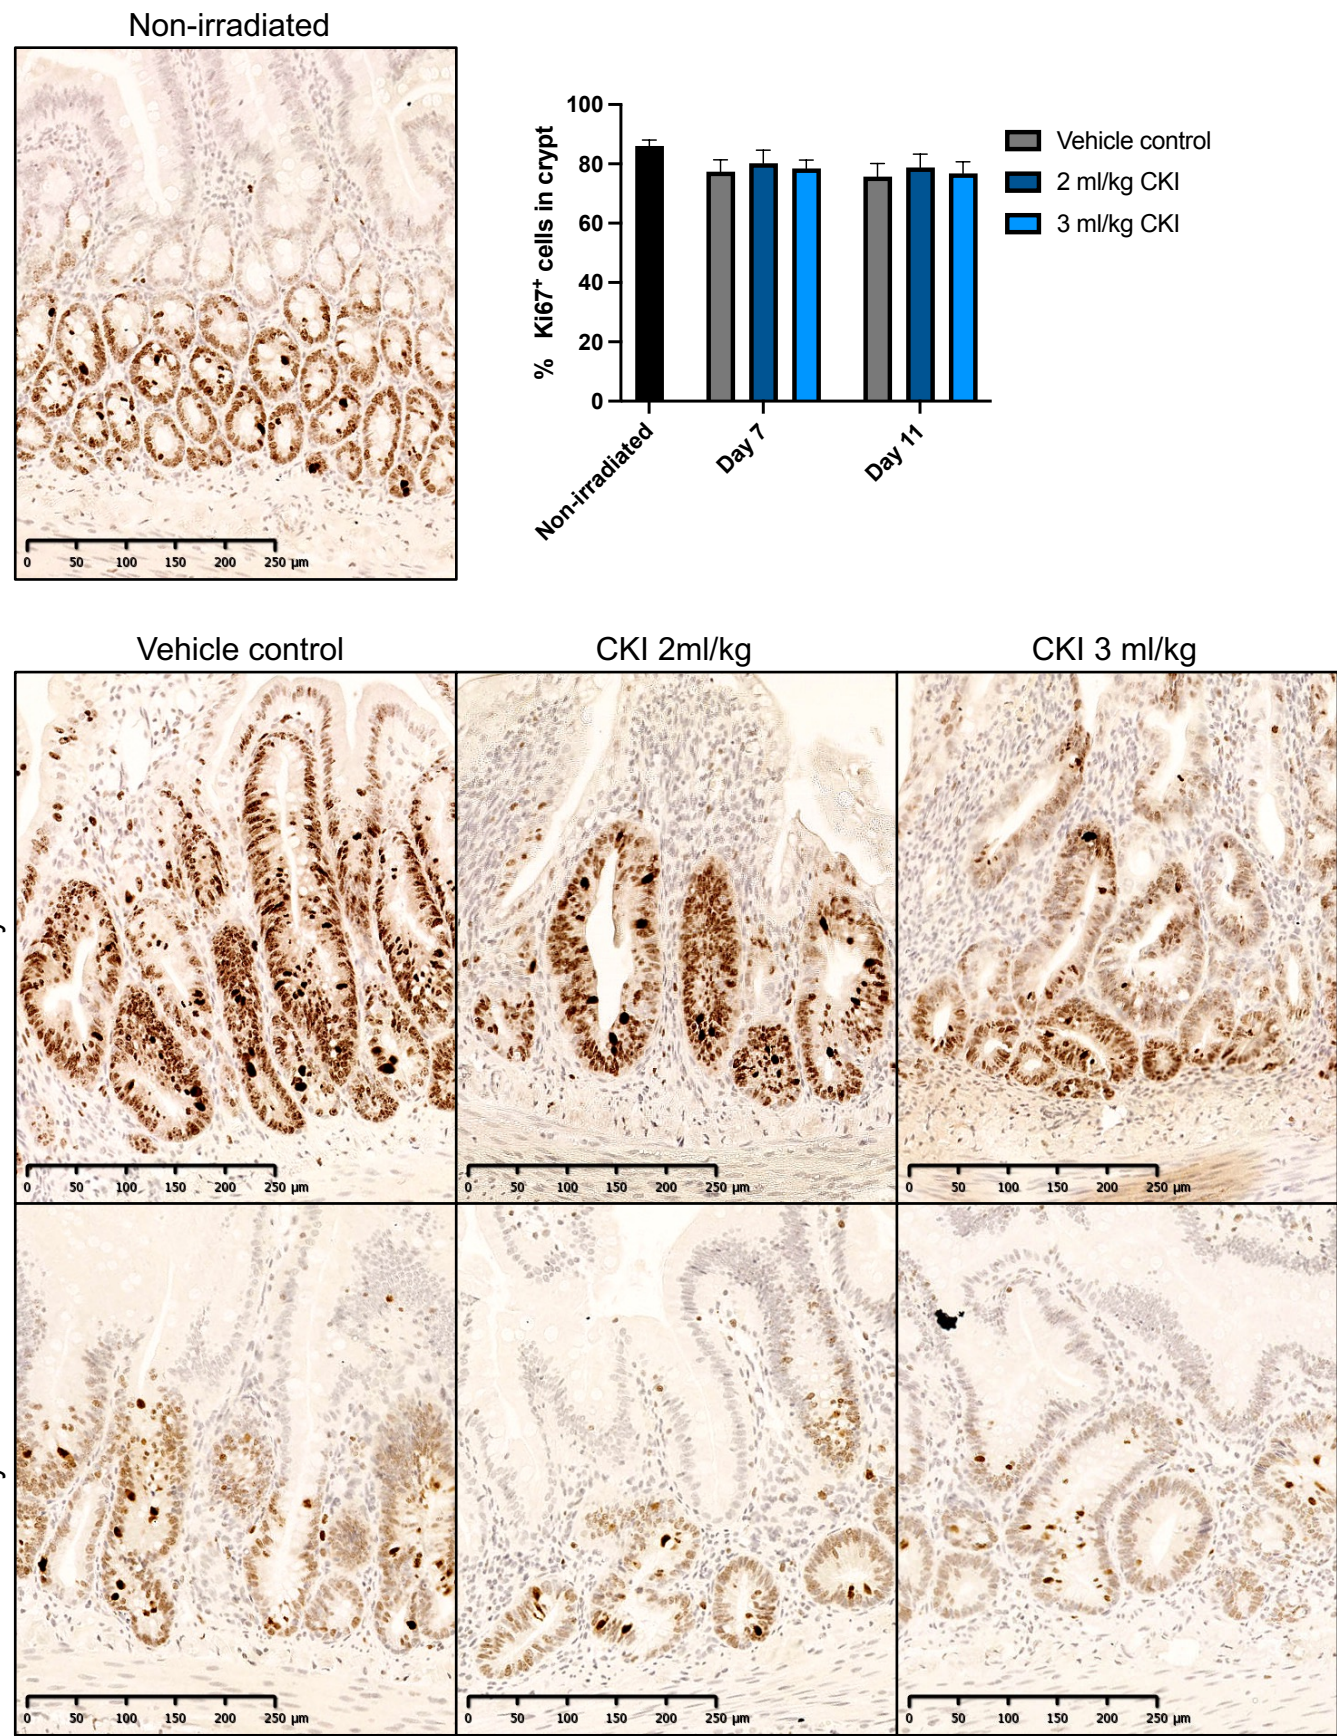



(c) Ileum

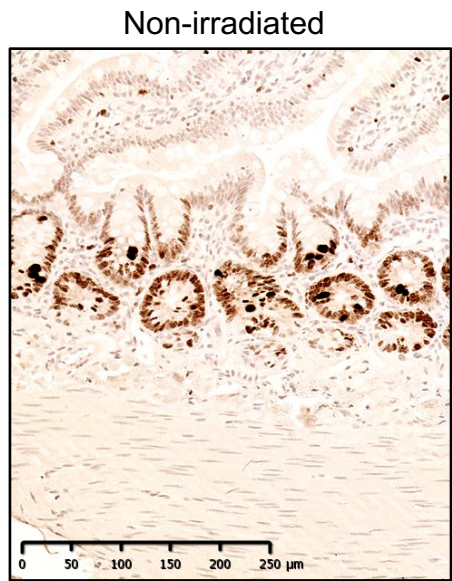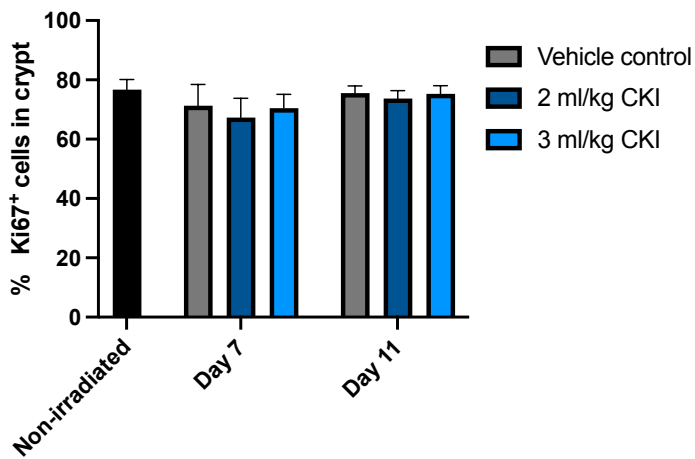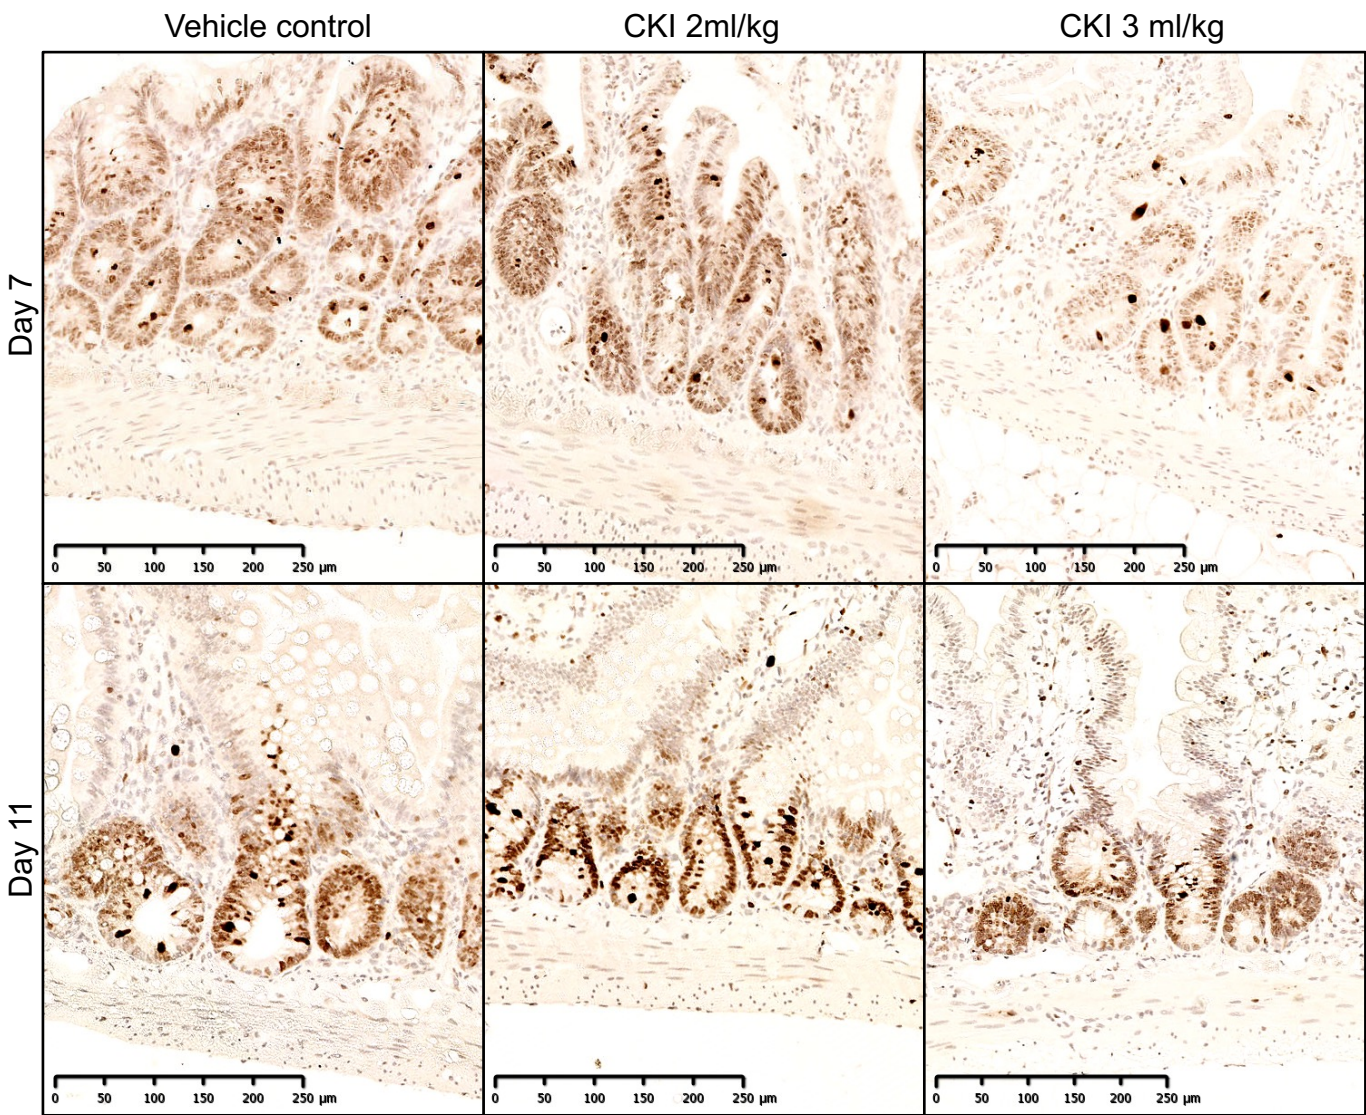



(d) Colon

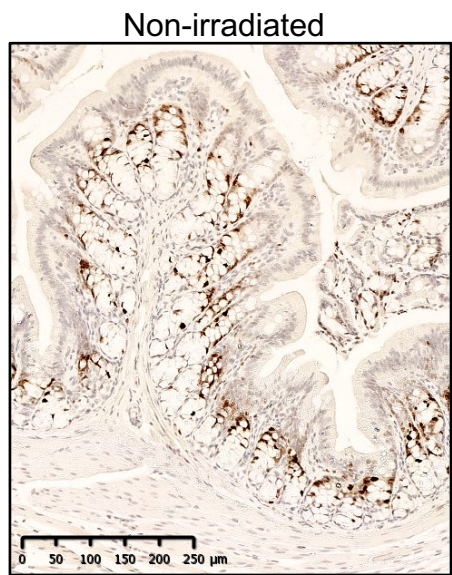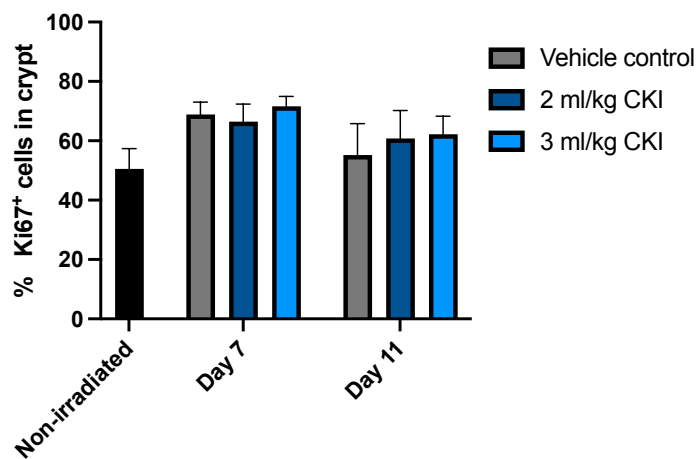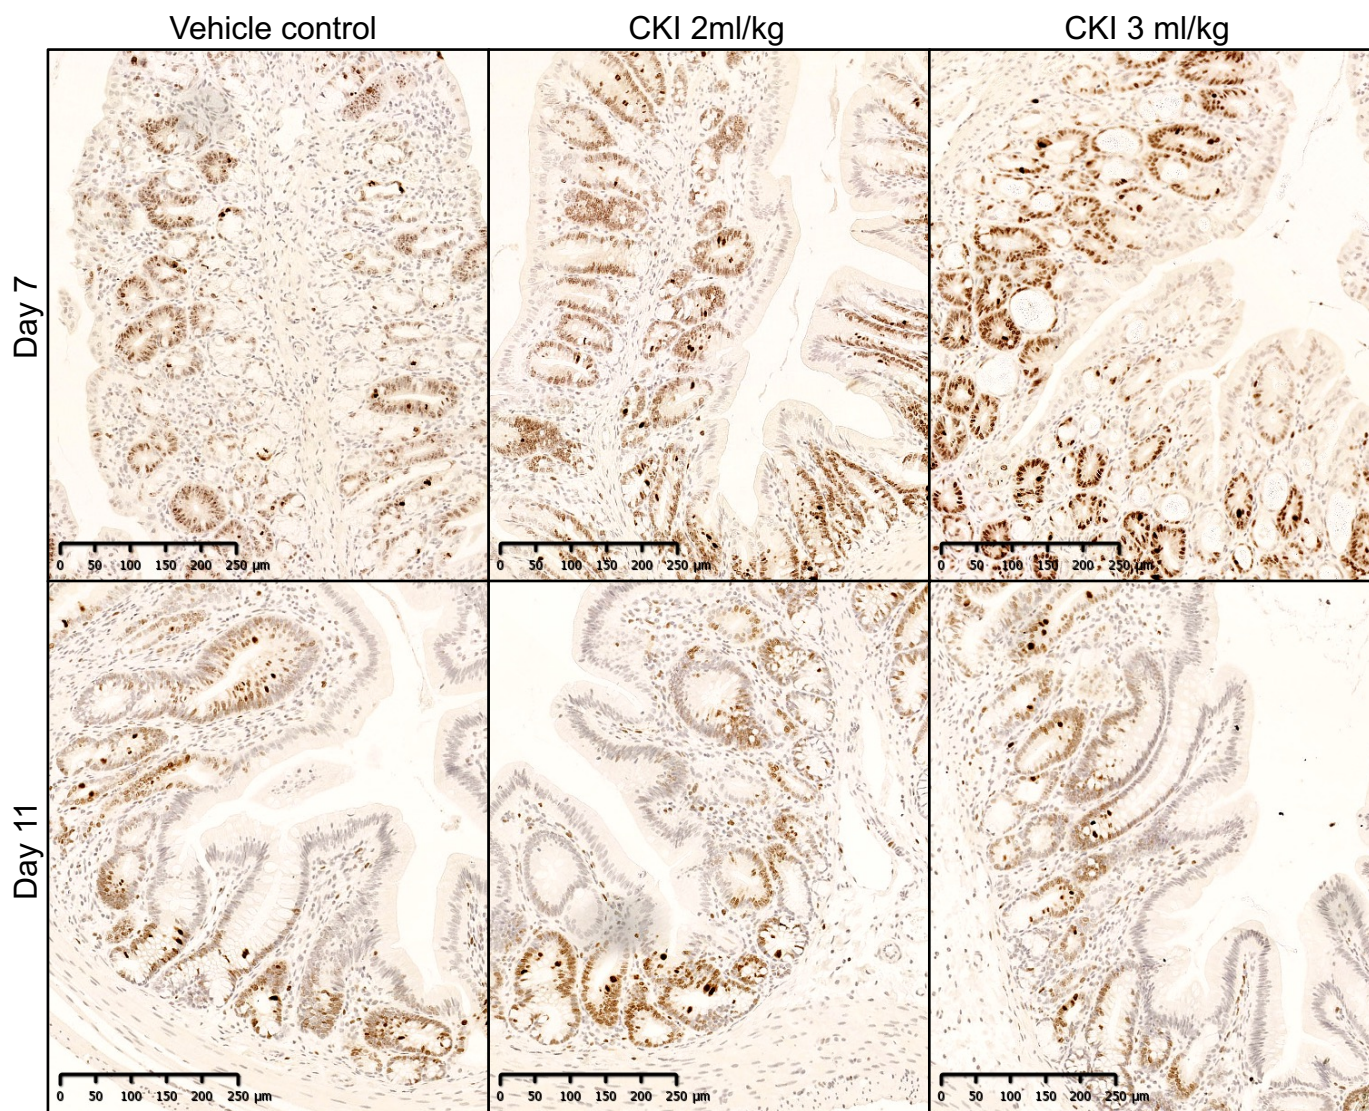



**Supplementary figure 4:** Administration of CKI have no effect on cell proliferation of irradiated epithelia. Representative IHC images of duodenum (a), jejunum (b), ileum (c) and colon (d) sections stained for Ki-67 and quantitation of Ki-67<sup>+</sup> cells (top-right). The intestines were collected from irradiated rats on day 7 and 11 post initial irradiation and paraffin-embedded tissues were sectioned for IHC detecting Ki-67. Data are represented as mean $\pm$ SD.
