# Supplementary material for: Compound Kushen injection reduces severity of radiation-induced gastrointestinal mucositis in rats
Source: Frontiers journal article supplement (doi:10.3389/fonc.2022.929735), 2022-08-11
Supplement: Image_6.PDF [file Image_6.PDF]

(h) IL-1 $\beta$  - Colon

Non-irradiated

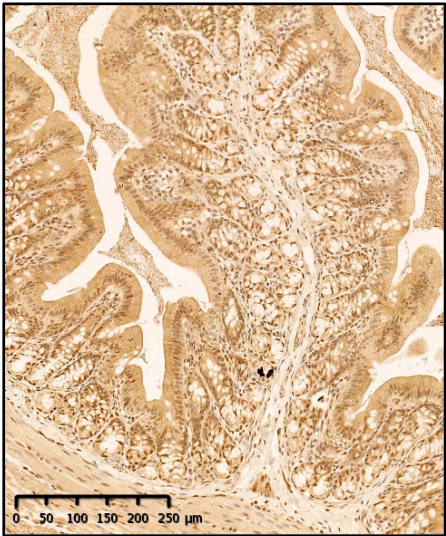

Vehicle control

CKI 2ml/kg

CKI 3 ml/kg

Day 7

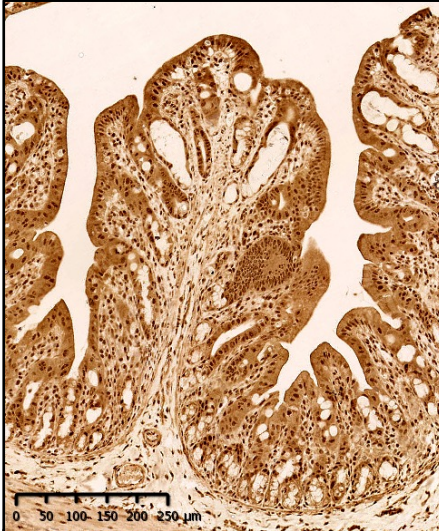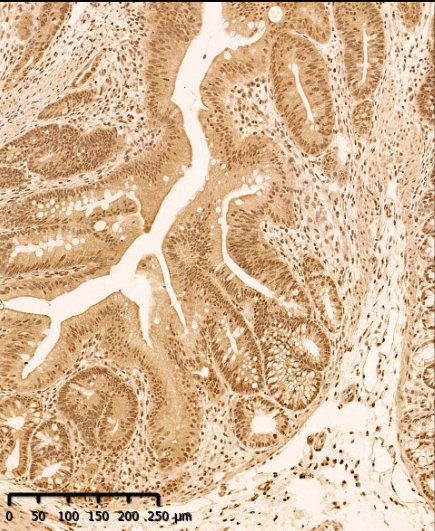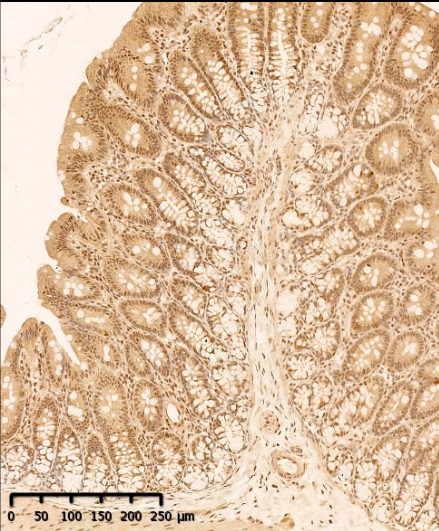

Day 11

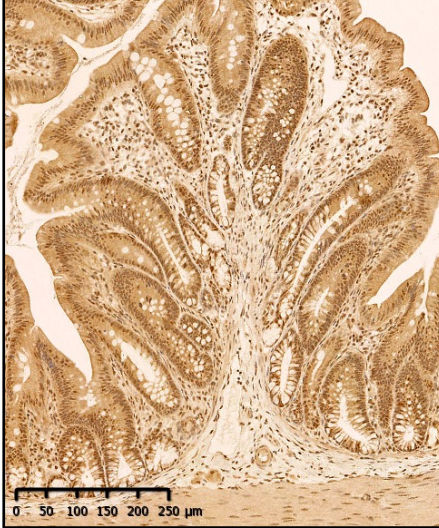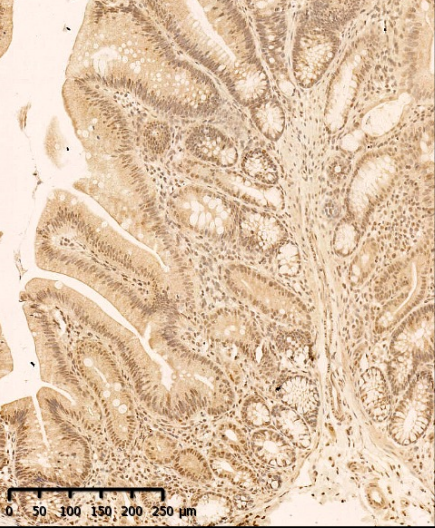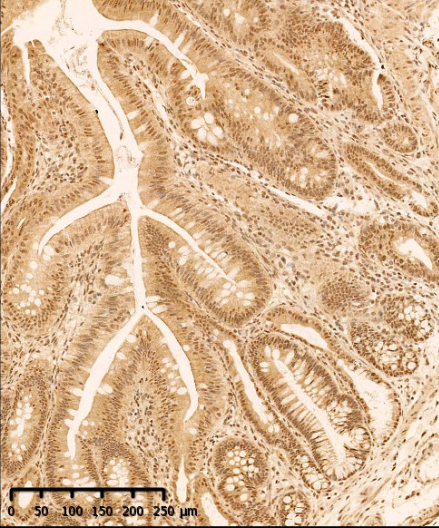

(i) IL-6 - Duodenum

Non-irradiated

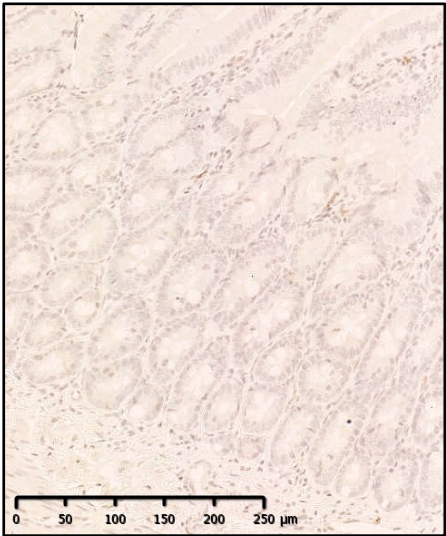

Vehicle control

CKI 2ml/kg

CKI 3 ml/kg

Day 7

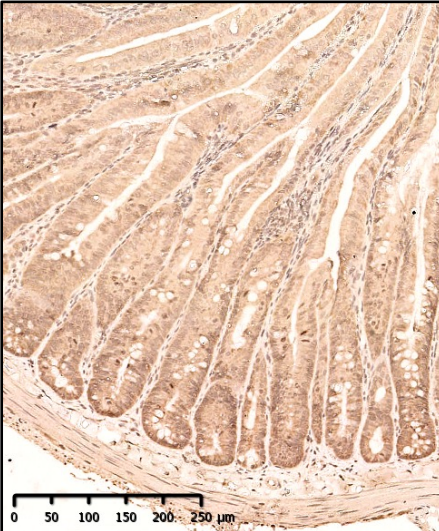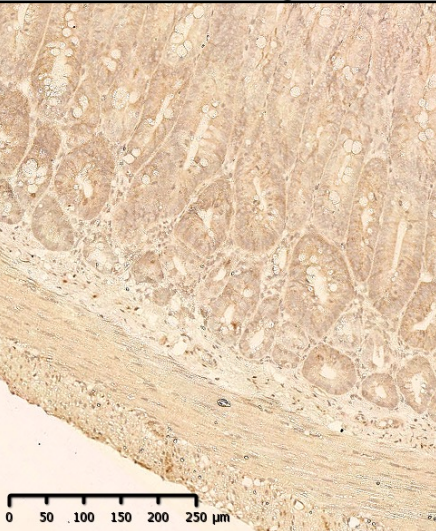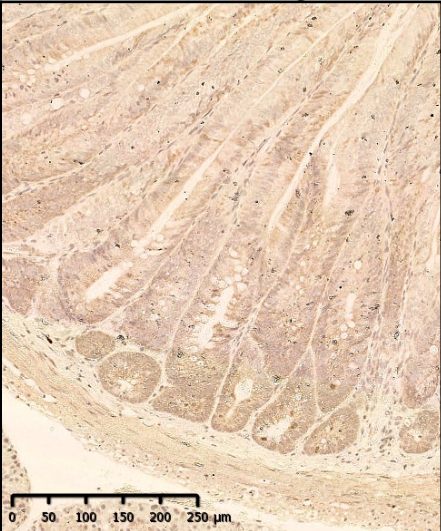

Day 11

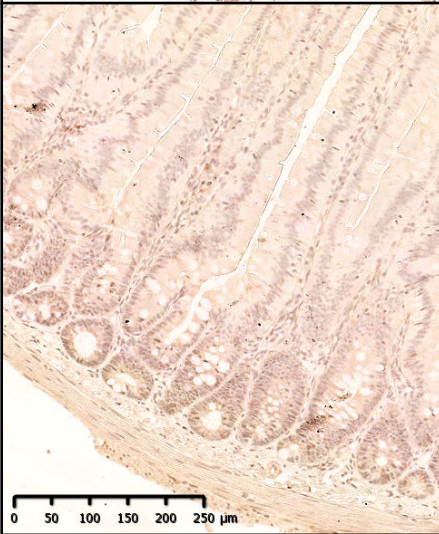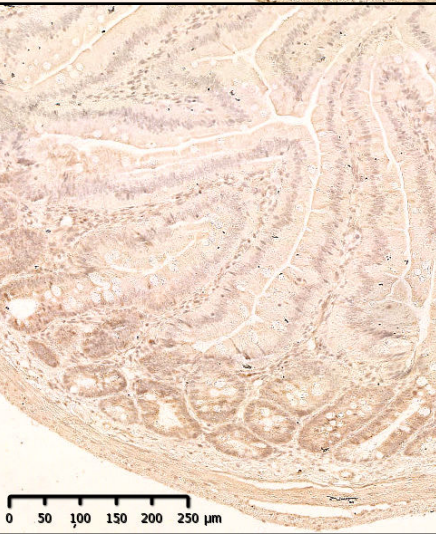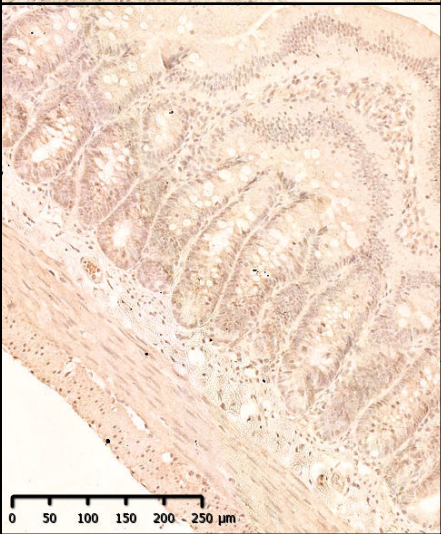

(j) IL-6 - Jejunum

Non-irradiated

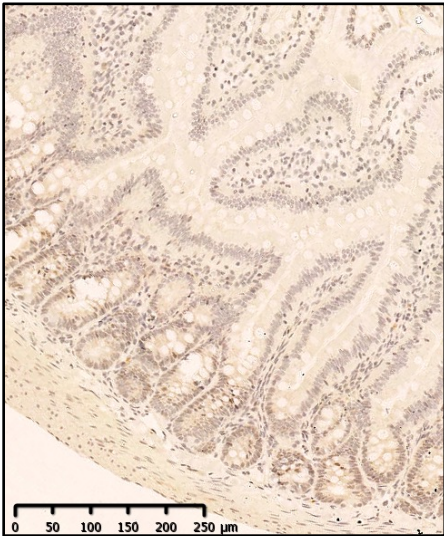

Vehicle control

CKI 2ml/kg

CKI 3 ml/kg

Day 7

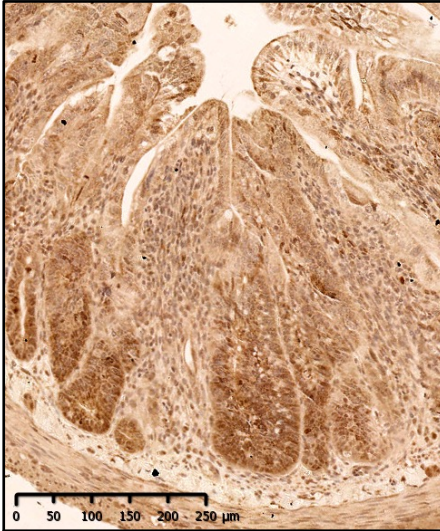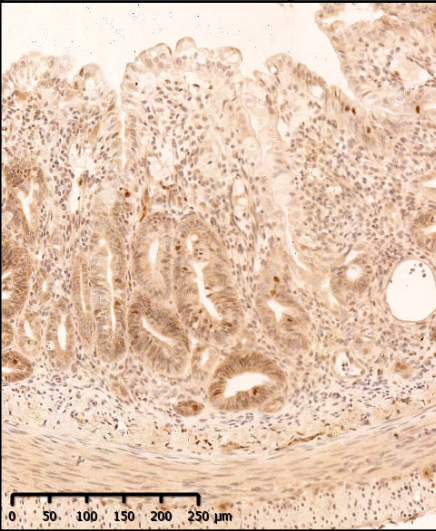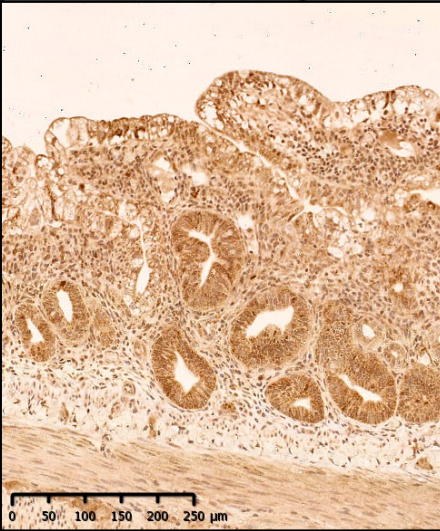

Day 11

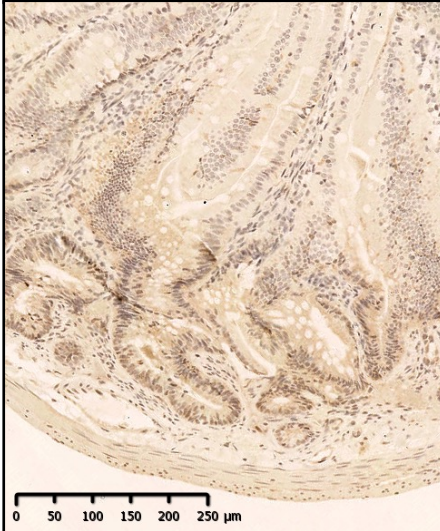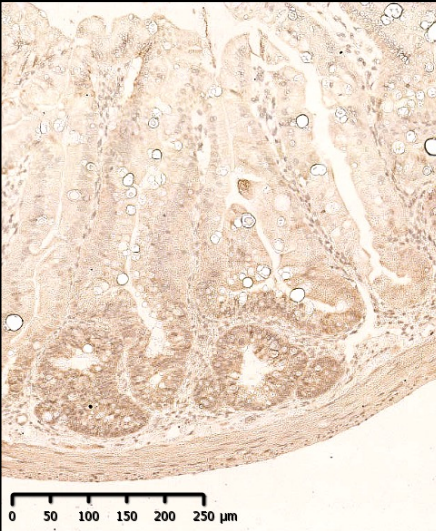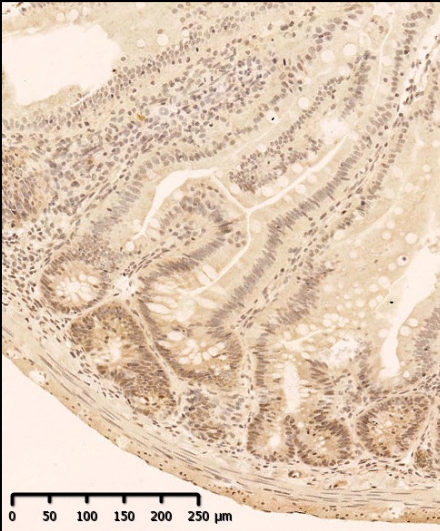

(k) IL-6 - Ileum

Non-irradiated

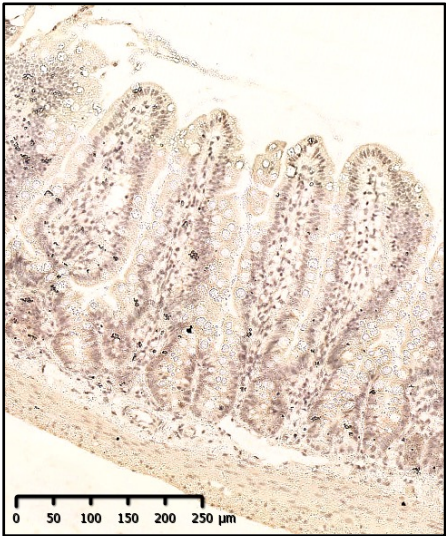

Vehicle control

CKI 2ml/kg

CKI 3 ml/kg

Day 7

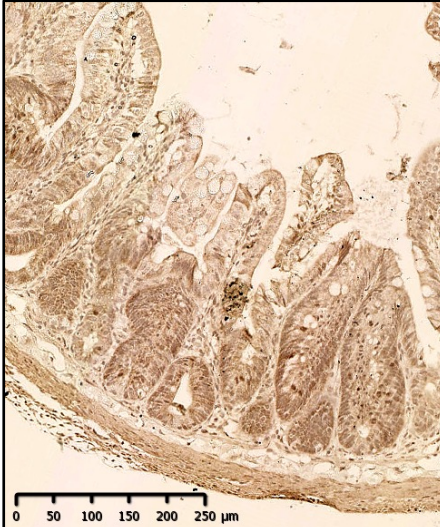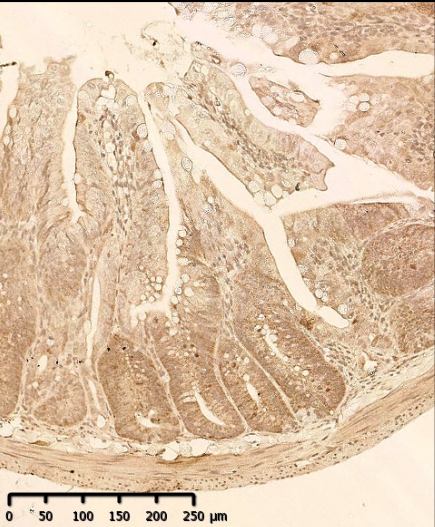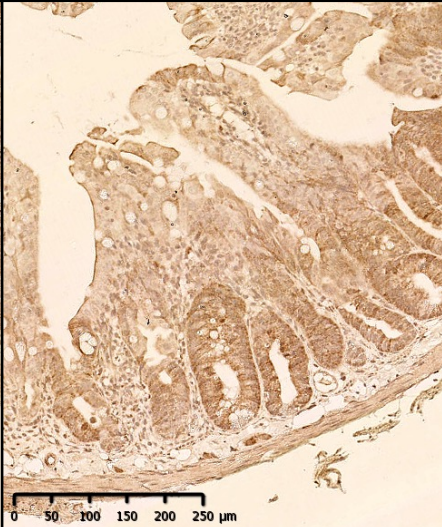

Day 11

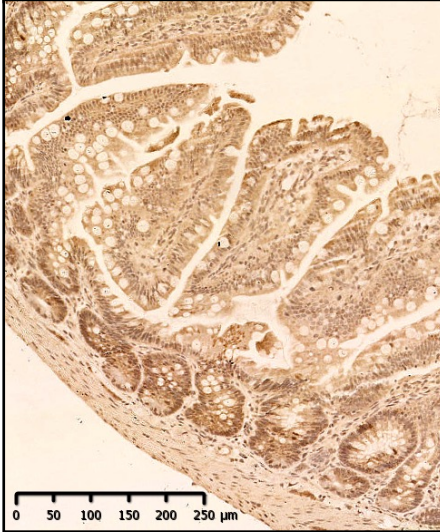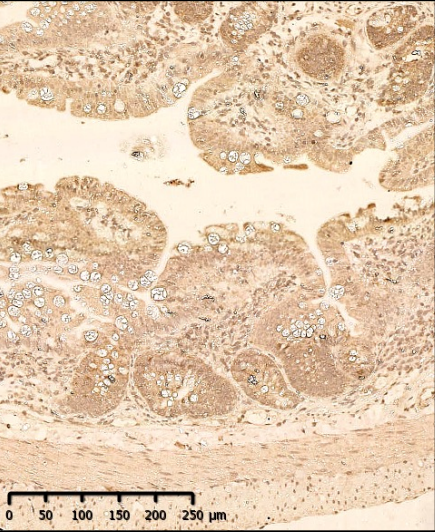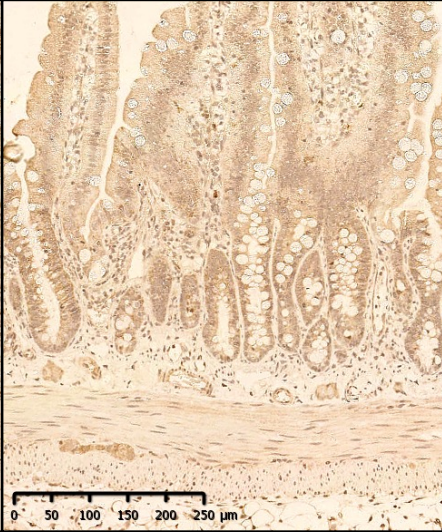

(I) IL-6 - Colon

Non-irradiated



Vehicle control

CKI 2ml/kg

CKI 3 ml/kg

Day 7

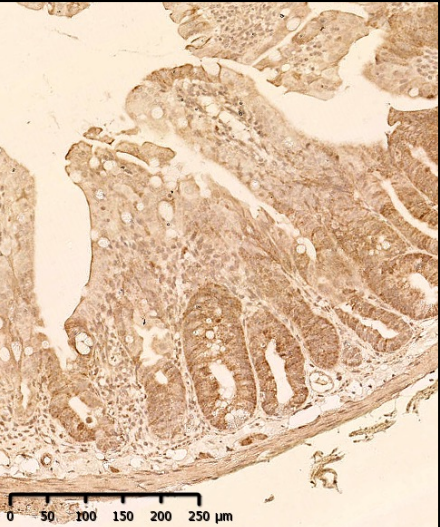

Day 11

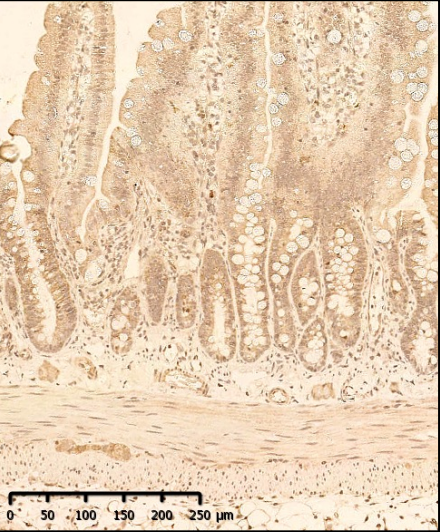

**Supplementary figure 5:** Administration of CKI reduces radiation induced mucosal inflammation. Representative IHC images of small and large intestines stained with MOP (a-d), IL-1 $\beta$  (e-h), IL-6 (i-l). The intestines were collected from irradiated rats on day 7 and 11 post initial irradiation and paraffin-embedded tissues were sectioned for IHC detecting inflammatory factors indicated.
